# Supplementary material for: Intrinsic Depot-Specific Differences in the Secretome of Adipose Tissue, Preadipocytes, and Adipose Tissue–Derived Microvascular Endothelial Cells
Source: PubMed Central journal article supplement — Diabetes. 2010 Sep 14;59(12):3008–16. doi: 10.2337/db10-0483 (PMC2992760; doi:10.2337/db10-0483), 2010-09-14
Supplement: supp_db10-0483_db100483onlineappendix.pdf [file supp_db10-0483_db100483onlineappendix.pdf]

Supplemental Table

| Accession   | Score | subcutaneous / light | SD (geo) | # peptides | visceral / light | SD (geo) | # peptides | visceral / subcutaneous | SD (geo) | # peptides | subcutaneous / visceral | SD (geo) | # peptides | Name                          | signal peptide? |
|-------------|-------|----------------------|----------|------------|------------------|----------|------------|-------------------------|----------|------------|-------------------------|----------|------------|-------------------------------|-----------------|
| CO3_MOUSE   | 2356  | 0.2345               | 1.5301   | 40         | 1.4037           | NN       | 41         | 3.8962                  | NN       | 42         | 0.2568                  | NN       | 42         | Complement C3                 | +               |
| A2M_MOUSE   | 2021  | 0.0027               | 5.4023   | 22         | 0.1973           | 5.208    | 21         | 1.0462                  | NN       | 33         | 0.5873                  | NN       | 33         | Alpha-2-macroglobulin         | +               |
| LAMB1_MOUSE | 2013  | 147.8561             | NN       | 35         | 0.0131           | NN       | 36         | 0.0465                  | NN       | 37         | 14.0493                 | 3.948    | 37         | Laminin subunit beta 1        | +               |
| LAMC1_MOUSE | 1988  | 0.0116               | 3.3026   | 36         | 0.0924           | 2.401    | 39         | 5.3939                  | 1.9632   | 40         | 0.1574                  | NN       | 40         | Laminin subunit gamma-1       | +               |
| LAMA2_MOUSE | 1409  | 0.2347               | 7.3423   | 25         | 79.6618          | 6.516    | 16         | 5.8369                  | 5.3994   | 26         | 0.079                   | 3.959    | 26         | Laminin subunit alpha-2       | +               |
| COEA1_MOUSE | 1323  | 0.1049               | 5.8287   | 20         | 0.0068           | 3.273    | 21         | 0.2932                  | 2.4055   | 21         | 3.3802                  | 2.326    | 22         | Collagen alpha-1(XIV) chain   | +               |
| FINC_MOUSE  | 1142  | 0.0947               | NN       | 24         | 0.0889           | NN       | 24         | 3.4279                  | 1.6325   | 26         | 0.1466                  | NN       | 26         | Fibronectin                   | +               |
| CES3_MOUSE  | 1132  | 0                    | 124.26   | 9          | 0.2224           | 26.73    | 15         | 7.7748                  | 2.8003   | 16         | 0.1269                  | 2.623    | 15         | Carboxylesterase 3            | +               |
| HPT_MOUSE   | 1103  | 0.6071               | NN       | 30         | 1.4466           | NN       | 31         | 2.5003                  | NN       | 31         | 0.3962                  | NN       | 31         | Haptoglobin                   | +               |
| CO1A2_MOUSE | 925   | 0.8646               | 3.0064   | 14         | 2.4478           | NN       | 14         | 1.0944                  | NN       | 15         | 0.37                    | NN       | 15         | Collagen alpha-2(I) chain     | +               |
| TRFE_MOUSE  | 924   | 0.1393               | NN       | 17         | 0.3349           | NN       | 17         | 1.3117                  | NN       | 17         | 0.3748                  | 1.501    | 17         | Serotransferrin               | +               |
| LAMB2_MOUSE | 896   | 2.5529               | 6.57     | 13         | 2.9645           | 13.3     | 16         | 0.5017                  | NN       | 17         | 0.0465                  | NN       | 17         | Laminin subunit beta-2        | +               |
| CFAB_MOUSE  | 880   | 1.2984               | 3.3092   | 16         | 0.9025           | NN       | 17         | 2.2097                  | 1.9195   | 19         | 0.4522                  | 1.92     | 19         | Complement factor B           | +               |
| CERU_MOUSE  | 879   | 0.2978               | 2.1026   | 20         | 0.09174          | NN       | 19         | 4.2408                  | 1.7977   | 20         | 0.2357                  | 1.798    | 20         | Ceruloplasmin                 | +               |
| SPA3N_MOUSE | 865   | 0.3548               | 1.941    | 13         | 0.0785           | NN       | 14         | 4.1321                  | NN       | 15         | 0.236                   | 1.397    | 14         | Serine protease inhibitor A3N | +               |
| SPA3K_MOUSE | 767   | 0.0921               | NN       | 13         | 0.2829           | 3.77     | 15         | 3.1605                  | 1.532    | 16         | 0.3164                  | 1.538    | 16         | Serine protease inhibitor A3K | +               |
| ESTN_MOUSE  | 726   | 0                    | 117.33   | 12         | 410.3341         | 54.3     | 12         | 21.8136                 | 12.037   | 14         | 0.0438                  | 6.26     | 14         | Liver carboxylesterase N      | +               |
| GELS_MOUSE  | 725   | 2.1874               | 2.7024   | 12         | 1.8006           | NN       | 12         | 1.0615                  | 2.5895   | 11         | 1.1021                  | 2.506    | 12         | Gelsolin                      | +               |
| CO4B_MOUSE  | 630   | 4.7321               | NN       | 14         | 0.1162           | NN       | 14         | 13.7332                 | NN       | 14         | 0.0729                  | NN       | 14         | Complement C4-B               | +               |
| NID2_MOUSE  | 618   | 0.1335               | 15.389   | 10         | 0.0743           | 17.48    | 9          | 3.4691                  | NN       | 8          | 0.288                   | NN       | 8          | Nidogen-2                     | +               |
| CATB_MOUSE  | 596   | 0.9457               | 1.5786   | 11         | 2.8716           | 1.5      | 12         | 6.2497                  | NN       | 13         | 0.16                    | NN       | 13         | Cathepsin B                   | +               |
| ANT3_MOUSE  | 591   | 0.9917               | 5.5633   | 9          | 0.0275           | 14.79    | 10         | 0.1622                  | NN       | 10         | 0.4252                  | 1.84     | 10         | Antithrombin-III              | +               |
| PGS2_MOUSE  | 579   | 0.003                | NN       | 12         | 0.0878           | NN       | 12         | 4.737                   | 1.818    | 12         | 0.1735                  | 1.827    | 12         | Decorin                       | +               |
| CO3A1_MOUSE | 564   | 0.0774               | NN       | 13         | 0.0805           | NN       | 14         | 2.4722                  | 2.0307   | 14         | 0.4055                  | 2.106    | 13         | Collagen alpha-1 (III) chain  | +               |
| MRC1_MOUSE  | 557   | 0.3938               | 3.1511   | 6          | 0.1811           | 5.605    | 7          | 0.2451                  | 1.9623   | 7          | 3.0343                  | 3.176    | 7          | Macrophage mannose receptor 1 | +               |
| BCAM_MOUSE  | 529   | 2.1488               | NN       | 5          | 0.3454           | 9.329    | 7          | 0.1956                  | 3.405    | 6          | 0.7619                  | 5.058    | 7          | Basal cell adhesion molecule  | +               |
| CFAH_MOUSE  | 496   | 0.2845               | 3.5494   | 4          | 1.2923           | 1.629    | 4          | 2.8502                  | 2.5445   | 4          | 0.1013                  | 3.698    | 4          | Complement factor H           | +               |
| MUG2_MOUSE  | 443   | 0.8978               | 10.808   | 9          | 0.0303           | 6.584    | 8          | 2.2843                  | 2.6403   | 9          | 0.3606                  | 2.441    | 9          | Murinoglobulin-2              | +               |
| FIBG_MOUSE  | 432   | 23.652               | 111.11   | 5          | 0.0583           | 9.867    | 6          | 0.034                   | 3.3982   | 5          | 23.2726                 | 7.762    | 6          | Fibrinogen gamma chain        | +               |
| ACE_MOUSE   | 410   | 31529                | 2.2909   | 8          | 0.8407           | 2.853    | 7          | 4.8181                  | 2.3835   | 8          | 0.2076                  | 2.384    | 8          | Angiotensin-convertine enzyme | +               |

|             |     |         |        |    |          |       |    |         |        |    |         |       |    |                                                                  |   |
|-------------|-----|---------|--------|----|----------|-------|----|---------|--------|----|---------|-------|----|------------------------------------------------------------------|---|
| PTX3_MOUSE  | 390 | 67.1404 | 18.032 | 4  | 1.2775   | NN    | 4  | 18.8319 | 1.8684 | 4  | 0.0531  | 1.87  | 4  | Pentraxin-related protein PTX3                                   | + |
| IC1_MOUSE   | 335 | 0.3138  | 1.5059 | 10 | 1.9644   | NN    | 10 | 8.8505  | 1.6387 | 11 | 0.113   | 1.639 | 11 | Plasma protease C1 inhibitor                                     | + |
| SPA3M_MOUSE | 332 | 0.0497  | NN     | 7  | 0.0828   | 5.602 | 8  | 1.9963  | 2.1728 | 9  | 0.501   | 2.174 | 9  | Serine protease inhibitor A3M                                    | + |
| SPA3C_MOUSE | 331 | 0.0765  | 4.283  | 7  | 0.6517   | 2.243 | 6  | 4.9315  | 1.6938 | 8  | 0.1036  | 2.32  | 8  | Serine protease inhibitor A3C                                    | + |
| NGAL_MOUSE  | 329 | 0.6059  | 2.5054 | 8  | 2.774    | NN    | 9  | 3.4368  | 2.8952 | 9  | 0.2909  | 2.895 | 9  | Neutrophil gelatinase-associated lipocalin                       | + |
| CFAD_MOUSE  | 324 | 1.3777  | 1.1318 | 8  | 1.3882   | 1.307 | 9  | 1.0363  | 1.2869 | 10 | 0.9651  | 1.287 | 10 | Complement factor D                                              | + |
| TSP1_MOUSE  | 320 | 0.6749  | NN     | 7  | 4.6335   | 1.662 | 7  | 11.1698 | NN     | 8  | 0.0895  | NN    | 8  | Thrombospondin-1                                                 | + |
| SODE_MOUSE  | 273 | 0.0249  | 6.6803 | 7  | 0.6839   | NN    | 7  | 32.3922 | 3.906  | 7  | 0.0309  | 3.908 | 7  | Extracellular superoxide dismutase                               | + |
| EST1_MOUSE  | 273 | 0       |        | 1  | 1279.303 | 7248  | 2  | 29.1106 | 7.2684 | 3  | 0.0343  | 7.268 | 3  | Liver carboxylesterase 1                                         | + |
| VIME_MOUSE  | 266 | 19.052  | 15.548 | 7  | 7.874    | 18.22 | 7  | 0.1172  | 2.9944 | 7  | 8.5334  | 2.995 | 7  | Vimentin                                                         | - |
| SPA3G_MOUSE | 264 | 0.1458  | 2.0431 | 5  | 0.4077   | 1.614 | 4  | 4.1362  | 1.8379 | 6  | 0.2418  | 1.838 | 6  | Serine protease inhibitor A3G                                    | + |
| HA11_MOUSE  | 257 | 0.064   | 2.6203 | 4  | 0.4928   | 8.451 | 4  | 2.7651  | 3.6004 | 4  | 0.3616  | 3.602 | 4  | H-2 class I histocompatibility antigen, D-B alpha chain          | + |
| NAR3_MOUSE  | 257 | 0.0102  | 4.8942 | 5  | 0.1511   | 2.59  | 5  | 2.2346  | 2.7769 | 5  | 0.4478  | 2.779 | 5  | Ecto-ADP-ribosyltransferase 3                                    | + |
| ACTB_MOUSE  | 252 | 0.0864  | 2.2551 | 3  | 0.0084   | 6.181 | 4  | 0.0113  | 12.465 | 4  | 2.6692  | 2.085 | 4  | Actin, cytoplasmic 1                                             | - |
| ENPP2_MOUSE | 248 | 0.5705  | 7.9102 | 4  | 20.8966  | 45.79 | 4  | 4.1023  | 3.9229 | 4  | 0.2442  | 3.918 | 4  | Ectonucleotide pyrophosphatase/phosphodiesterase family member 2 | + |
| CATD_MOUSE  | 241 | 4.4144  | 2.6096 | 5  | 7.329    | 1.58  | 5  | 15.1463 | 1.7158 | 5  | 0.0661  | 1.717 | 5  | Cathepsin D                                                      | + |
| DAG1_MOUSE  | 234 | 0.0746  | 12.925 | 4  | 0.0326   | 8.666 | 3  | 0.4972  | 2.7699 | 4  | 2.0113  | 2.77  | 4  | Dystroglycan                                                     | + |
| APOH_MOUSE  | 234 | 2.5298  | 14.217 | 5  | 0.0336   | 8.856 | 6  | 0.0429  | 5.1466 | 6  | 14.834  | NN    | 7  | Beta-2-glycoprotein 1                                            | + |
| LDHA_MOUSE  | 225 | 6.2293  | 102.84 | 5  | 0.0132   | 7.267 | 5  | 3.738   | 1.8834 | 5  | 94.8116 | 36.54 | 6  | L-Lactate dehydrogenase A chain                                  | - |
| 1433E_MOUSE | 221 | 0.2642  | 4.6931 | 4  | 0.0752   | 2.557 | 3  | 0.1222  | 3.3431 | 4  | 8.1332  | 3.365 | 4  | 14-3-3 protein epsilon                                           | - |
| PRDX1_MOUSE | 220 | 0.0557  | 2.5041 | 3  | 0.0009   | 45.33 | 2  | 0.0192  | 5.6478 | 3  | 51.9662 | 5.666 | 3  | Perioredoxin-1                                                   | + |
| HA18_MOUSE  | 211 | 0.096   | 4.0313 | 4  | 17.7184  | 9.17  | 4  | 11.9042 | 5.2122 | 4  | 0.084   | 5.215 | 4  | H-2 class I histocompatibility antigen, Q8 alpha chain           | + |
| HA17_MOUSE  | 209 | 0.0723  | 15.272 | 4  | 12.848   | 84.12 | 4  | 10.7956 | 5.0913 | 4  | 0.0926  | 5.093 | 4  | H-C class I histocompatibility antigen, Q7 alpha chain           | + |
| PRDX3_MOUSE | 205 | 0.7238  | 554.81 | 2  | 0.2169   | 18.85 | 3  | 12.5873 | 29.162 | 4  | 0.0794  | 29.18 | 4  | Thioredoxin-dependent peroxide reductase, mitochondrial          | - |
| SPRC_MOUSE  | 196 | 0.6078  | 1.9262 | 5  | 0.637    | NN    | 5  | 1.3967  | 1.5854 | 5  | 0.7159  | 1.585 | 5  | SPARC                                                            | + |
| CS1B_MOUSE  | 190 | 0.1541  | 5.6117 | 3  | 0.025    | 37.62 | 3  | 3.4848  | 1.8287 | 3  | 0.287   | 1.829 | 3  | Complement C1s-B subcomponent                                    | + |
| TIMP1_MOUSE | 189 | 0.133   | 1.0512 | 2  | 4.0578   | 1.085 | 3  | 4.7096  | 11.338 | 3  | 0.212   | 11.32 | 3  | Metalloproteinase inhibitor 1                                    | + |
| CO4A2_MOUSE | 184 | 0.091   | 5.164  | 5  | 0.0022   | 14.33 | 6  | 0.8723  | 1.4616 | 6  | 1.1459  | 1.462 | 6  | Collagen alpha-2(IV) chain                                       | + |

|             |     |        |        |    |         |       |    |         |        |    |         |       |    |                                                         |   |
|-------------|-----|--------|--------|----|---------|-------|----|---------|--------|----|---------|-------|----|---------------------------------------------------------|---|
| PGCP_MOUSE  | 179 | 0.0341 | 1.5236 | 3  | 0.1248  | 8.307 | 3  | 0.4097  | 4.2368 | 3  | 1.0224  | 9.465 | 3  | Plasma glutamate carboxypeptidase                       | + |
| EGFR_MOUSE  | 178 | 0.1552 | 2.1393 | 7  | 0.0291  | 3.81  | 7  | 0.394   | NN     | 7  | 2.5379  | NN    | 7  | Epidermal growth factor receptor                        | + |
| CSF1_MOUSE  | 172 | 1.8347 | 1.6213 | 3  | 3.7602  | 1.035 | 3  | 2.2038  | 15.802 | 3  | 0.4399  | 2.846 | 3  | Macrophage colony-stimulating factor 1                  | + |
| ECM1_MOUSE  | 172 | 1.8373 | 14.61  | 5  | 9.3324  | 3.051 | 5  | 0.1997  | 9.7599 | 5  | 5.0015  | 9.763 | 5  | Extracellular matrix protein 1                          | + |
| ADIPO_MOUSE | 171 | 0.1614 |        | 1  | 0.9812  | 1.977 | 2  | 0.0218  | 269.86 | 2  | 1.1816  | 4.549 | 2  | Adiponectin                                             | + |
| SPA3F_MOUSE | 165 | 0.1948 | 2.4731 | 3  | 0.65    | 1.955 | 3  | 3.596   | 1.6332 | 4  | 0.2782  | 1.622 | 4  | Serine protease inhibitor A3F                           | + |
| ACTH_MOUSE  | 165 | 1.209  | 4.5053 | 3  | 0.0904  | 6.231 | 4  | 0.0008  | 22.87  | 4  | 3.4122  | 2.076 | 4  | Actin, gamma-enteric smooth muscle                      | - |
| MAOX_MOUSE  | 161 | 1.3967 |        | 1  | 0.1691  | 15.43 | 2  | 1.3692  | 2.8414 | 2  | 0.7304  | 2.841 | 2  | NADP-dependent malic enzyme                             | - |
| KV2A7_MOUSE | 150 | 0.0468 |        | 1  | 4.6922  |       | 1  | 39.7792 |        | 1  | 0.0251  |       | 1  | Ig kappa chain V-II region 26-10                        | - |
| CADH5_MOUSE | 149 | 0.0971 | 2.6599 | 6  | 0.1081  | NN    | 6  | 0.719   | NN     | 6  | 0.6453  | 1.948 | 6  | Cadherin-5                                              | + |
| HA10_MOUSE  | 149 | 0.1115 | 2.5899 | 2  | 33.2274 | 78.69 | 2  | 17.1972 | 22.526 | 2  | 0.0581  | 22.52 | 2  | H-2 class I histocompatibility antigen, Q10 alpha chain | + |
| BPA1_MOUSE  | 148 | 0.0004 | 21.432 | 12 | 0.0606  | 8.403 | 12 | 9.2942  | 4.3497 | 14 | 0.0957  | 6.633 | 14 | Bullous pemphigoid antigen 1, isoforms 1/2/3/4          | - |
| ANGT_MOUSE  | 142 | 2.1243 |        | 1  | 7.5441  |       | 1  | 50.0499 |        | 1  | 0.02    |       | 1  | Angiotensinogen                                         | + |
| ITIH2_MOUSE | 127 | 7.2441 |        | 1  | 0.1507  |       | 1  | 0.0169  |        | 1  | 59.1728 |       | 1  | Inter-alpha-trypsin inhibitor heavy chain H2            | + |
| CATL1_MOUSE | 121 | 0.0077 | 101.64 | 2  | 2.2435  | 1.381 | 2  | 15.3019 | 15.435 | 2  | 0.0654  | 15.44 | 2  | Cathepsin L1                                            | + |
| MACF1_MOUSE | 120 | 0.1814 | NN     | 12 | 0.0355  | 7.83  | 13 | 1.0881  | 3.3499 | 13 | 0.7352  | 2.833 | 13 | Microtubule-actin cross-linking factor 1                | - |
| CO2_MOUSE   | 117 | 0.1838 | 3.0852 | 5  | 0.084   | 5.556 | 5  | 8.581   | 3.0821 | 5  | 0.1166  | 3.081 | 5  | Complement C2                                           | + |
| AMRP_MOUSE  | 114 | 0.2356 | 5.7393 | 4  | 0.0813  | 15.69 | 5  | 0.7802  | 12.774 | 5  | 0.844   | 3.519 | 4  | Alpha-2-macroglobulin receptor-associated protein       | + |
| PXDC2_MOUSE | 111 | 0.1589 | 13.219 | 2  | 0.2218  | 3.478 | 2  | 3.1057  | 12.37  | 2  | 0.3197  | 12.9  | 2  | Plexin domain-containing protein 2                      | + |
| SAP_MOUSE   | 107 | 3.2836 | 1.9121 | 3  | 2.3312  | 1.339 | 3  | 34.6713 | 3.8008 | 4  | 0.0292  | 3.785 | 4  | Sulfated glycoprotein 1                                 | + |
| CD14_MOUSE  | 107 | 0.1239 |        | 1  | 5.9176  |       | 1  | 54.9729 |        | 1  | 0.0182  |       | 1  | Monocyte differentiation antigen CD14                   | + |
| CAH3_MOUSE  | 105 | 0.0843 |        | 1  | 0.3909  | 5.124 | 2  | 0.0235  | 9.9987 | 2  | 42.5432 | 9.992 | 2  | Carbonic anhydrase 3                                    | - |
| CYB5_MOUSE  | 104 | 0.082  | 5.8284 | 2  | 0.1961  | 8.997 | 2  | 0.145   | 50.898 | 2  | 7.6463  | 61.84 | 2  | Cytochrome b5                                           | - |
| PLXC1_MOUSE | 99  | 1.1268 | 6.5146 | 5  | 0.3903  | 3.465 | 5  | 0.2068  | 2.2722 | 5  | 4.8353  | 2.272 | 5  | Plexin-C1                                               | + |
| A2MP_MOUSE  | 99  | 0.0201 | 23.581 | 3  | 1.8505  | 10.53 | 3  | 0.3333  | 46.713 | 3  | 0.4291  | 10.09 | 3  | Alpha-2-macroglobulin-P                                 | + |
| POSTN_MOUSE | 99  | 3.1756 | 1.7059 | 2  | 0.1401  | 16.22 | 2  | 0.018   | 18.05  | 2  | 4.2549  | 2.874 | 2  | Periostin                                               | + |
| DYH3_MOUSE  | 94  | 0.076  | 7.1555 | 9  | 1.1202  | 4.631 | 10 | 1.1125  | 4.1426 | 10 | 0.5698  | 4.153 | 10 | Dynein heavy chain 3, axonemal                          | - |
| PLOD1_MOUSE | 91  | 1.0155 |        | 1  | 0.3721  | 817.9 | 2  | 2.3807  | 1.4291 | 2  | 0.4198  | 1.427 | 2  | Procollagen-lysine,2-oxoglutarate 5-dioxygenase 1       | + |

|             |    |          |        |   |          |       |   |         |        |   |         |       |   |                                                                              |   |
|-------------|----|----------|--------|---|----------|-------|---|---------|--------|---|---------|-------|---|------------------------------------------------------------------------------|---|
| CO1A1_MOUSE | 88 | 0.3773   |        | 1 | 4.3784   |       | 1 | 13.8932 |        | 1 | 0.0719  |       | 1 | Collagen alpha-1(I) chain                                                    | + |
| ACTBL_MOUSE | 87 | 218.2882 | 100.78 | 2 | 0.0078   | 6.04  | 3 | 0.003   | 10.812 | 3 | 6.3158  | 2.942 | 3 | Beta-actin-like protein 2                                                    | - |
| HERC2_MOUSE | 86 | 0.6902   | 7.5135 | 7 | 4.1693   | 4.218 | 7 | 0.7363  | 3.9473 | 7 | 1.3565  | 3.946 | 7 | Probable E3 ubiquitin-protein ligase<br>HERC2                                | - |
| MSH3_MOUSE  | 85 | 0.2613   | 21.788 | 6 | 1.5996   | 7.759 | 6 | 2.8729  | 17.507 | 6 | 0.2656  | 3.625 | 6 | DNA mismatch repair protein Msh3                                             | - |
| ASPM_MOUSE  | 82 | 0.6162   | 3.8044 | 8 | 0.123    | 4.485 | 9 | 2.0761  | 2.4856 | 9 | 0.4821  | 2.484 | 9 | Abnormal spindle-like microcephaly-<br>associated protein homolog            | - |
| ASAP2_MOUSE | 82 | 0.0002   | 29.871 | 4 | 0.0826   | 2.924 | 3 | 0.7028  | 1.4637 | 4 | 1.4229  | 1.464 | 4 | Arf-GAP with SH3 domain, ANK<br>repeat and PH domain-containing<br>protein 2 | - |
| SPTB1_MOUSE | 81 | 0.0737   | 24.094 | 9 | 4.5364   | 11.6  | 9 | 0.3966  | 6.3907 | 9 | 1.7392  | 7.132 | 9 | Spectrin beta chain, erythrocyte                                             | - |
| GVIN1_MOUSE | 81 | 3.1184   | 142.69 | 6 | 390.3908 | 390.4 | 6 | 11.8529 | 75.807 | 6 | 0.0694  | 10.93 | 6 | Interferon-induced very large GTPase<br>1                                    | - |
| NAL9C_MOUSE | 80 | 0.94     | 43.103 | 3 | 0.0456   | 7.369 | 4 | 0.0441  | 16.381 | 4 | 22.663  | 16.35 | 4 |                                                                              | - |
| DPEP1_MOUSE | 79 | 2.2056   | 42.514 | 4 | 0.0628   | 9.143 | 4 | 0.0357  | 4.865  | 4 | 28.0178 | 4.864 | 4 | Dipeptidase 1                                                                | + |
| CHD9_MOUSE  | 78 | 16.6318  | NN     | 3 | 3.4233   | 26.36 | 3 | 4.4816  | 4.5902 | 5 | 0.2232  | 4.589 | 5 | Chromodomain-helicase-DNA-<br>binding protein 9                              | - |
| CAD13_MOUSE | 78 | 2.6301   | 2.9062 | 2 | 0.0032   | 65.78 | 2 | 6.5059  | 3.5891 | 3 | 0.01537 | 3.59  | 3 | Cadherin-13                                                                  | + |
| GAS7_MOUSE  | 77 | 5.9727   | 1.1733 | 2 | 3.3274   | 1.129 | 2 | 0.2346  | NN     | 3 | 4.2677  | NN    | 3 | Growth arrest specific 7                                                     | - |
| CYC_MOUSE   | 77 | 0.0196   |        | 1 | 0.0544   |       | 1 | 0.1362  |        | 1 | 7.3408  |       | 1 | Cytochrome c, somatic                                                        | - |
| S22A3_MOUSE | 71 | 20.9636  | 860.78 | 2 | 0.0205   | 2.447 | 2 | 0.0241  | 91.564 | 2 | 41.5784 | 91.69 | 2 | Solute carrier family 22 member 3                                            | - |
| PAI1_MOUSE  | 70 | 0.7036   | 2.4482 | 4 | 4.94     | 62.59 | 4 | 9.7866  | 7.5482 | 3 | 0.1021  | 7.548 | 3 | Plasminogen activator inhibitor 1                                            | + |
| ANR53_MOUSE | 70 | 0.1377   | 18.094 | 4 | 0.3512   | 9.616 | 3 | 10.0498 | NN     | 4 | 0.082   | NN    | 4 | Ankyrin repeat domain-containing<br>protein 53                               | - |
| MMRN2_MOUSE | 70 | 12.5096  | 6.0477 | 2 | 0.0051   |       | 1 | 4.6797  | 1224.7 | 2 | 0.2137  | 1225  | 2 | Multimerin-2                                                                 | + |
| TTF2_MOUSE  | 70 | 0.0769   | 5.0286 | 4 | 0.022    | 3.893 | 4 | 0.1806  | 2.7587 | 4 | 5.5294  | 2.757 | 4 | Transcription termination factor 2                                           | - |
| SACS_MOUSE  | 69 | 0.0605   | 5.4009 | 5 | 0.0454   | 5.286 | 5 | 0.6014  | 4.3245 | 6 | 1.5689  | 3.762 | 6 |                                                                              | - |
| MGAP_MOUSE  | 69 | 0.3918   | 4.6819 | 8 | 0.7102   | 11.54 | 7 | 8.7736  | 2.4715 | 8 | 0.1085  | NN    | 8 | MAX gene-associated protein                                                  | - |
| ILRL1_MOUSE | 68 | 0.1565   |        | 1 | 3.5857   |       | 1 | 0.4894  | 35.437 | 2 | 2.0441  | 35.42 | 2 | Interleukin-1 receptor-like 1                                                | + |
| EVPL_MOUSE  | 68 | 0.1793   | 1.946  | 5 | 0.3531   | NN    | 7 | 3.2461  | 9.8823 | 7 | 0.3189  | 8.984 | 7 | Envoplakin                                                                   | - |
| NAR5_MOUSE  | 68 | 0.0015   |        | 1 | 5.3171   | 20.82 | 2 | 0.0518  | 52.954 | 2 | 19.2719 | 52.96 | 2 | Ecto-ADP-ribosyltransferase 5                                                | + |
| UBR4_MOUSE  | 68 | 0.6076   | 8.985  | 4 | 0.0239   | 1.433 | 3 | 0.3207  | 47.595 | 4 | 0.4693  | 3.642 | 4 | E3 ubiquitin-protein ligase UBR4                                             | - |
| GANAB_MOUSE | 68 | 0.1478   |        | 1 | 0.0332   |       | 1 | 0.217   |        | 1 | 4.608   |       | 1 | Neutral alpha-glucosidase AB                                                 | + |
| NCOR1_MOUSE | 68 | 1.4281   | 7.223  | 6 | 0        | NN    | 7 | 0.6675  | 27.994 | 7 | 1.4979  | 28.01 | 7 | Nuclear receptor corepressor 1                                               | - |
| CC136_MOUSE | 67 | 0.2326   | 7.6904 | 3 | 45.7854  | 90.66 | 7 | 0.169   | NN     | 8 | 5.1836  | NN    | 8 | coiled-coil domain-containing                                                | - |

|              |    |        |        |    |          |       |    |         |        |    |         |       |    | protein 136                                                      |   |
|--------------|----|--------|--------|----|----------|-------|----|---------|--------|----|---------|-------|----|------------------------------------------------------------------|---|
| TRPM7_MOUSE  | 67 | 9.5688 | NN     | 6  | 7.0928   | 7.806 | 6  | 0.0408  | 3.7778 | 6  | 21.7104 | 2.597 | 6  | Transient receptor potential cation channel subfamily M member 7 | - |
| STRUMP_MOUSE | 67 | 2.1322 | 1.7139 | 2  | 111.9759 | 5.426 | 2  | 16.8345 | 37.023 | 2  | 0.0594  | 37.05 | 2  | Strumpelin                                                       | - |
| PARD3_MOUSE  | 67 | 0.2391 | 6.643  | 8  | 0.0839   | 4.915 | 8  | 0.1408  | 11.43  | 8  | 0.6806  | 2.786 | 8  | Partitioning defective homolog                                   | - |
| CD158_MOUSE  | 66 | 0.0085 | 46.142 | 6  | 0.166    | 33.22 | 6  | 3.106   | 7.501  | 6  | 0.2552  | 5.38  | 6  | Coiled-coil domain-containing protein 158                        | - |
| ACLY_MOUSE   | 66 | 4.3181 | 12.444 | 2  | 0.0022   | 41.17 | 4  | 0.021   | 45.961 | 3  | 8.4078  | 13.4  | 4  | ATP-citrate synthase                                             | - |
| ACTN4_MOUSE  | 66 | 0.2177 | 4.877  | 3  | 1.0321   | 9.228 | 3  | 1.9221  | 47.294 | 3  | 0.0438  | 10.03 | 3  | Alpha-actinin-4                                                  | - |
| LRP2_MOUSE   | 66 | 0.3556 | 11.453 | 12 | 1.7702   | 5.511 | 12 | 1.3135  | 2.6414 | 12 | 0.4406  | 3.083 | 11 | Low-density lipoprotein receptor-related protein 2               | + |
| RPAP1_MOUSE  | 66 | 0.3742 | 3.3283 | 5  | 0.7171   | 23.5  | 5  | 3.4288  | 8.2411 | 5  | 0.2915  | 8.241 | 5  | RNA polymerase II-associated protein 1                           | - |
| CAH2_MOUSE   | 65 | 0.0839 | 1.6259 | 2  | 0.2907   | 1.828 | 2  | 2.2056  | 1.3659 | 2  | 0.4533  | 1.367 | 2  | Carbonic anhydrase 2                                             | - |
| NAL9B_MOUSE  | 65 | 0.0155 | 66.915 | 3  | 0.2934   | 9.635 | 3  | 0.7537  | 7.8936 | 3  | 1.3252  | 7.878 | 3  |                                                                  | - |
| VINC_MOUSE   | 65 | 0.1572 | 2.1518 | 3  | 22.0341  | 14.25 | 3  | 4.645   | 2.7834 | 3  | 0.2153  | 2.785 | 3  | Vinculin                                                         | - |
| EIF3A_MOUSE  | 65 | 0.0715 | 2.3693 | 6  | 0.4094   | 26.22 | 7  | 4.3212  | 5.0885 | 7  | 0.2177  | 11.56 | 7  | Eukaryotic translation initiation factor 3 subunit A             | - |
| MA7D2_MOUSE  | 65 | 0.3336 | 141.99 | 5  | 0.1566   | 33.83 | 5  | 6.7425  | NN     | 5  | 0.1488  | NN    | 5  | MAP7 domain-containing protein 2                                 | - |
| CO6A1_MOUSE  | 64 | 0.064  | 12.294 | 2  | 0.0746   | 8.676 | 2  | 1.9258  | 1.5233 | 2  | 0.5188  | 1.523 | 2  | Collagen alpha-1(VI) chain                                       | + |
| BRCA2_MOUSE  | 64 | 0      | 88.789 | 8  | 0.3277   | 5.421 | 10 | 3.8641  | 5.9921 | 11 | 0.2566  | 6.786 | 10 | Breast cancer type 2 susceptibility protein homolog              | - |
| TBCK_MOUSE   | 64 | 0.451  | 5.0835 | 3  | 0.656    | 19.89 | 3  | 16.6585 | 9.2643 | 4  | 0.0354  | 35.91 | 4  |                                                                  | - |
| MDHM_MOUSE   | 64 | 0.4328 |        | 1  | 1.4402   |       | 1  | 12.6742 |        | 1  | 0.079   |       | 1  | Malate dehydrogenase, mitochondrial                              | - |
| LAMP1_MOUSE  | 64 | 0.5988 |        | 1  | 1.9068   |       | 1  | 2.5343  |        | 1  | 0.3946  |       | 1  | Lysosome-associated membrane glycoprotein 1                      | + |
| MYO5A_MOUSE  | 64 | 0.0991 | 10.193 | 4  | 0.0168   | 20.25 | 4  | 0.0777  | 4.342  | 4  | 2.0474  | 1.786 | 4  | Myosin-Va                                                        | - |
| ZSWM5_MOUSE  | 63 | 0.504  | nn     | 6  | 0.1894   | NN    | 6  | 0.1203  | 1.6787 | 5  | 2.7207  | 2.914 | 6  | Zinc finger SWIM domain-containing protein 5                     | - |
| UBP36_MOUSE  | 62 | 0.1443 | 31.736 | 6  | 0.0539   | 8.691 | 6  | 0.6201  | 4.4281 | 6  | 1.6127  | 4.429 | 6  |                                                                  | - |
| MGT5A_MOUSE  | 62 | 0.1529 | 15.664 | 2  | 0.6463   | 79.39 | 2  | 3.4498  | 1.0897 | 2  | 0.29    | 1.09  | 2  |                                                                  | - |
| WDR64_MOUSE  | 62 | 0.0479 | 3.0752 | 3  | 0.6202   | 5.376 | 3  | 7.6007  | 3.1374 | 3  | 0.1255  | 3.244 | 3  | WD repeat-containing domain protein 64                           | - |
| KIF27_MOUSE  | 62 | 0.1525 | 2.9077 | 5  | 1.9513   | 22.49 | 6  | 0.1688  | 6.6567 | 6  | 5.9215  | 6.655 | 6  |                                                                  | - |
| SEM7A_MOUSE  | 62 | 0.5533 |        | 1  | 1.6165   |       | 1  | 3.2088  |        | 1  | 0.312   |       | 1  | Semaphorin-7A                                                    | + |

|             |    |          |        |    |        |       |    |        |        |    |         |       |    |                                                             |   |
|-------------|----|----------|--------|----|--------|-------|----|--------|--------|----|---------|-------|----|-------------------------------------------------------------|---|
| IFIT2_MOUSE | 62 | 457.5546 | 7557.6 | 2  | 0.0001 | 110.9 | 2  | 0.0997 | 33.34  | 2  | 1.026   | 33.36 | 2  | Interferon-induced protein with tetratricopeptide repeats 2 | - |
| MINT_MOUSE  | 62 | 0.492    | 9.0921 | 13 | 0.0114 | NN    | 13 | 0.6154 | 2.3897 | 13 | 5.3222  | 2.854 | 13 | Mxs2-interacting protein                                    | - |
| ATRX_MOUSE  | 61 | 0.9456   | 5.2326 | 7  | 0.1083 | 4.805 | 6  | 0.0796 | 5.4935 | 6  | 12.5475 | 5.486 | 6  | Transcriptional regulator ATRX                              | - |
| MA7D1_MOUSE | 61 | 4.1372   | 3.0154 | 3  | 0.0012 | 31.26 | 4  | 0.2126 | 3.9806 | 4  | 4.7022  | 3.98  | 4  | MAP7 domain-containing protein 1                            | - |
| F91A1       | 61 | 15.9334  | 786.65 | 2  | 4.249  | 18.66 | 2  | 0.044  | 27.682 | 3  | 22.7443 | 27.71 | 3  |                                                             | - |
| GLU2B_MOUSE | 61 | 2.8153   | 1.1815 | 2  | 1.5869 | 3.171 | 2  | 0.2904 | 5.1074 | 2  | 3.4447  | 5.119 | 2  | Glucosidase 2 subunit beta                                  | + |
